# Supplementary material
Source: publisher figshare collection journal article supplement (https://gsajournals.figshare.com/ndownloader/files/13878995)
Supplement: Supplementary file 1 [file 13878995]

Table S9 The genes involved in *M. dispar* transcription system

| Locus | Product | Gene | Protein length (aa) | Position |
| --- | --- | --- | --- | --- |
| M.dispar-GS01_GM000010 | heat-inducible transcription repressor | *hrcA* | 335 | 11132…12139 |
| M.dispar-GS01_GM000013 | DNA-directed RNA polymerase subunit delta | *rpoE* | 81 | 14479…14724 |
| M.dispar-GS01_GM000028 | ribonuclease R | *vacB* | 696 | 32196…34286 |
| M.dispar-GS01_GM000058 | RNA polymerase primary sigma factor | *rpoD* | 687 | 60268…62331 |
| M.dispar-GS01_GM000083 | DNA-directed RNA polymerase subunit beta' | *rpoC* | 1413 | 100365…104606 |
| M.dispar-GS01_GM000084 | DNA-directed RNA polymerase subunit beta | *rpoB* | 1216 | 104668…108318 |
| M.dispar-GS01_GM000120 | N utilization substance protein B | *nusB* | 281 | 157123…157968 |
| M.dispar-GS01_GM000175 | RpiR family transcriptional regulator | - | 259 | 216873…217652 |
| M.dispar-GS01_GM000243 | RNase H-fold protein,involved in anti-termination at Rho-dependent terminators | - | 147 | 290161…290604 |
| M.dispar-GS01_GM000278 | RpiR family transcriptional regulator | - | 271 | 346663…347478 |
| M.dispar-GS01_GM000330 | DNA-directed RNA polymerase subunit alpha | *rpoA* | 332 | 397460…398458 |
| M.dispar-GS01_GM000410 | transcriptional regulator MraZ | *mraZ* | 146 | 525719…526159 |
| M.dispar-GS01_GM000457 | transcriptional regulatory protein | - | 241 | 588791…589516 |
| M.dispar-GS01_GM000547 | transcriptional regulator | - | 273 | 700268…701089 |
| M.dispar-GS01_GM000576 | transcription elongation protein NusA | *nusA* | 636 | 753611…755521 |
| M.dispar-GS01_GM000787 | sigma-70 family RNA polymerase sigma factor | *rpoD* | 181 | 1014081…1014626 |
| M.dispar-GS01_GM000789 | transcriptional antiterminator NusG | *nusG* | 183 | 1015097…1015648 |
| M.dispar-GS01_GM000792 | segregation and condensation protein B | *scpB* | 195 | 1020150…1020737 |
| M.dispar-GS01_GM000816 | transcription elongation factor GreA | *greA* | 160 | 1051878…1052360 |
